# Supplementary material for: Homoleptic polynuclear CuIand AgIcomplexes of N-thiophosphorylated thioureaso-RO(O)CC6H4NHC(S)NHP(S)(OiPr)2(R = Me, Et)
Source: Royal Society of Chemistry journal article supplement (doi:10.1039/c2ce06346h), 2011-12-12
Supplement: c2ce06346h.pdf [file c2ce06346h.pdf]

## Electronic Supplementary Information

### Homoleptic polynuclear Cu<sup>I</sup> and Ag<sup>I</sup> complexes of *N*-thiophosphorylated thioureas *o*-RO(O)CC<sub>6</sub>H<sub>4</sub>NHC(S)NHP(S)(*OiPr*)<sub>2</sub> (R = Me, Et)

Damir A. Safin,<sup>\*a</sup> Maria G. Babashkina,<sup>a</sup> Michael Bolte<sup>b</sup> and Yann Garcia<sup>a</sup>

<sup>a</sup> *Institute of Condensed Matter and Nanosciences, MOST - Inorganic Chemistry, Université Catholique de Louvain, Place L. Pasteur 1, 1348 Louvain-la-Neuve, Belgium. Fax: +32(0) 1047 2330; Tel: +32(0) 1047 2831; E-mail: damir.safin@ksu.ru*

<sup>b</sup> *Institut für Anorganische Chemie J.-W.-Goethe-Universität, Frankfurt/Main, Germany.*

### Physical measurements

Infrared spectra (Nujol) were recorded with a Thermo Nicolet 380 FT-IR spectrometer in the range 400–3600 cm<sup>-1</sup>. NMR spectra in CDCl<sub>3</sub> were obtained on a Bruker Avance 300 MHz spectrometer at 25 °C. <sup>1</sup>H and <sup>31</sup>P{<sup>1</sup>H} NMR spectra were recorded at 299.948 and 121.420 MHz, respectively. Chemical shifts are reported with reference to SiMe<sub>4</sub> (<sup>1</sup>H) and 85% H<sub>3</sub>PO<sub>4</sub> (<sup>31</sup>P{<sup>1</sup>H}). Electronic spectra of absorption in 10<sup>-4</sup> M solution were measured on a Lambda-35 spectrometer in the range 200–1000 nm. Elemental analyses were performed on a Thermoquest Flash EA 1112 Analyzer from CE Instruments.

### Synthesis of [Cu<sub>3</sub>L<sup>I,II</sup><sub>3</sub>], [Ag<sub>4</sub>L<sup>I</sup><sub>4</sub>] and [Ag<sub>5</sub>L<sup>II</sup><sub>5</sub>]

A suspension of **HL<sup>I,II</sup>** (0.390 and 0.404 g, respectively; 1 mmol) in aqueous methanol (15 mL) was mixed with KOH (0.062 g, 1.1 mmol). The resulting mixture was added dropwise to a suspension of CuI or AgNO<sub>3</sub> (0.190 and 0.170 g, respectively; 1 mmol) in aqueous methanol (15 mL). The mixture was stirred at room temperature for 5 h. The resulting precipitate of KI or KNO<sub>3</sub> was filtered off and the solvent was then removed in vacuum. The residue was recrystallised from a CH<sub>2</sub>Cl<sub>2</sub>–*n*-hexane mixture (1 : 3, v/v).

**[Cu<sub>3</sub>L<sup>I</sup><sub>3</sub>]:** Yield: 0.412 g (91%). IR: 579 (P=S), 967 (POC), 1536 (SCN), 1707 (C=O), 3261 (NH) cm<sup>-1</sup>. <sup>1</sup>H NMR: 1.28 (d, <sup>3</sup>J<sub>H,H</sub> = 6.0 Hz, 18 H, CH<sub>3</sub>, *iPr*), 1.35 (d, <sup>3</sup>J<sub>H,H</sub> = 6.1 Hz, 18 H, CH<sub>3</sub>, *iPr*), 3.91 (s, 9 H, CH<sub>3</sub>, Me), 4.82 (d. sept, <sup>3</sup>J<sub>H,H</sub> = 6.1 Hz, <sup>3</sup>J<sub>P,H</sub> = 10.6 Hz, 6 H, OCH), 7.04 (d. t, <sup>3</sup>J<sub>H,H</sub> = 7.5 Hz, <sup>4</sup>J<sub>H,H</sub> = 1.2 Hz, 3 H, C<sub>6</sub>H<sub>4</sub>), 7.42 (d. t, <sup>3</sup>J<sub>H,H</sub> = 7.5 Hz, <sup>4</sup>J<sub>H,H</sub> = 1.6 Hz, 3 H, C<sub>6</sub>H<sub>4</sub>), 7.97 (d. d, <sup>3</sup>J<sub>H,H</sub> = 7.9 Hz, <sup>4</sup>J<sub>H,H</sub> = 1.4 Hz, 3 H, C<sub>6</sub>H<sub>4</sub>), 8.51 (d, <sup>3</sup>J<sub>H,H</sub> = 8.4 Hz, <sup>4</sup>J<sub>H,H</sub> = 1.4 Hz, 3 H, C<sub>6</sub>H<sub>4</sub>), 10.90 (d, <sup>4</sup>J<sub>PNCNH</sub> = 6.3 Hz, 3 H, NH) ppm. <sup>31</sup>P{<sup>1</sup>H} NMR: 52.9 ppm. *Anal.* Calc. for C<sub>45</sub>H<sub>66</sub>Cu<sub>3</sub>N<sub>6</sub>O<sub>12</sub>P<sub>3</sub>S<sub>6</sub> (1358.97): C 39.77, H 4.90, N 6.18. Found: C 39.92, H 4.83, N 6.26.

**[Cu<sub>3</sub>L<sup>II</sup><sub>3</sub>]:** Yield: 0.392 g (84%). IR: 582, 585 (P=S), 974 (POC), 1540, 1543 (SCN), 1710 (C=O), 3273 (NH) cm<sup>-1</sup>. <sup>1</sup>H NMR: 1.28 (d, <sup>3</sup>J<sub>H,H</sub> = 6.2 Hz, 18 H, CH<sub>3</sub>, *iPr*), 1.35 (d, <sup>3</sup>J<sub>H,H</sub> = 6.2 Hz, 18 H, CH<sub>3</sub>, *iPr*), 1.41 (t, <sup>3</sup>J<sub>H,H</sub> = 7.0 Hz, 9 H, CH<sub>3</sub>, Et), 4.37 (q, <sup>3</sup>J<sub>H,H</sub> = 7.0 Hz, 6 H, CH<sub>2</sub>, Et), 4.83 (d. sept, <sup>3</sup>J<sub>H,H</sub> = 6.2 Hz, <sup>3</sup>J<sub>P,H</sub> = 10.6 Hz, 6 H, OCH), 7.05 (t, <sup>3</sup>J<sub>H,H</sub> = 7.5 Hz, 3 H, C<sub>6</sub>H<sub>4</sub>), 7.41 (t, <sup>3</sup>J<sub>H,H</sub> = 7.5 Hz, 3 H, C<sub>6</sub>H<sub>4</sub>), 7.98 (d, <sup>3</sup>J<sub>H,H</sub> = 7.9 Hz, 3 H,

C<sub>6</sub>H<sub>4</sub>), 8.50 (d, <sup>3</sup>J<sub>H,H</sub> = 8.4 Hz, 3 H, C<sub>6</sub>H<sub>4</sub>), 10.95 (d, <sup>4</sup>J<sub>PNCNH</sub> = 7.9 Hz, 3 H, NH) ppm. <sup>31</sup>P{<sup>1</sup>H} NMR: 53.7 ppm.

*Anal.* Calc. for C<sub>48</sub>H<sub>72</sub>Cu<sub>3</sub>N<sub>6</sub>O<sub>12</sub>P<sub>3</sub>S<sub>6</sub> (1401.05): C 41.15, H 5.18, N 6.00. Found: C 41.03, H 5.24, N 5.95.

**[Ag<sub>4</sub>L<sup>I</sup><sub>4</sub>]:** Yield: 0.433 g (87%). IR: 584 (P=S), 979 (POC), 1531 (SCN), 1703 (C=O), 3268 (NH) cm<sup>-1</sup>. <sup>1</sup>H NMR: 1.30 (d, <sup>3</sup>J<sub>H,H</sub> = 6.1 Hz, 24 H, CH<sub>3</sub>, *i*Pr), 1.34 (d, <sup>3</sup>J<sub>H,H</sub> = 6.0 Hz, 24 H, CH<sub>3</sub>, *i*Pr), 3.90 (s, 12 H, CH<sub>3</sub>, Me), 4.80 (d. sept, <sup>3</sup>J<sub>H,H</sub> = 6.1 Hz, <sup>3</sup>J<sub>P,H</sub> = 10.6 Hz, 8 H, OCH), 7.00 (br. s, 4 H, C<sub>6</sub>H<sub>4</sub>), 7.38 (br. s, 4 H, C<sub>6</sub>H<sub>4</sub>), 7.93 (br. s, 4 H, C<sub>6</sub>H<sub>4</sub>), 8.48 (br. s, 4 H, C<sub>6</sub>H<sub>4</sub>), 11.09 (br. s, 4 H, NH) ppm. <sup>31</sup>P{<sup>1</sup>H} NMR: 55.4 ppm. *Anal.* Calc. for C<sub>60</sub>H<sub>88</sub>Ag<sub>4</sub>N<sub>8</sub>O<sub>16</sub>P<sub>4</sub>S<sub>8</sub> (1989.25): C 36.23, H 4.46, N 5.63. Found: C 36.38, H 4.39, N 5.70.

**[Ag<sub>5</sub>L<sup>II</sup><sub>5</sub>]:** Yield: 0.414 g (81%). IR: 580 (P=S), 991 (POC), 1537 (SCN), 1712 (C=O), 3257 (NH) cm<sup>-1</sup>. <sup>1</sup>H NMR: 1.33 (d, <sup>3</sup>J<sub>H,H</sub> = 6.0 Hz, 30 H, CH<sub>3</sub>, *i*Pr), 1.37 (d, <sup>3</sup>J<sub>H,H</sub> = 6.1 Hz, 30 H, CH<sub>3</sub>, *i*Pr), 1.46 (t, <sup>3</sup>J<sub>H,H</sub> = 7.1 Hz, 15 H, CH<sub>3</sub>, Et), 4.42 (q, <sup>3</sup>J<sub>H,H</sub> = 7.1 Hz, 10 H, CH<sub>2</sub>, Et), 4.88 (d. sept, <sup>3</sup>J<sub>H,H</sub> = 6.1 Hz, <sup>3</sup>J<sub>P,H</sub> = 10.8 Hz, 10 H, OCH), 7.09 (br. s, 5 H, C<sub>6</sub>H<sub>4</sub>), 7.43 (br. s, 5 H, C<sub>6</sub>H<sub>4</sub>), 7.99 (br. s, 5 H, C<sub>6</sub>H<sub>4</sub>), 8.42 (br. s, 5 H, C<sub>6</sub>H<sub>4</sub>), 11.16 (br. s, 5 H, NH) ppm. <sup>31</sup>P{<sup>1</sup>H} NMR: 56.1 ppm. *Anal.* Calc. for C<sub>80</sub>H<sub>120</sub>Ag<sub>5</sub>N<sub>10</sub>O<sub>20</sub>P<sub>5</sub>S<sub>10</sub> (2556.70): C 37.58, H 4.73, N 5.48. Found: C 37.71, H 4.65, N 5.54.

## Synthesis of [Ag(phen)L<sup>II</sup>]

**Path A.** A suspension of **phen** (0.090 g, 0.5 mmol) in anhydrous CH<sub>2</sub>Cl<sub>2</sub> (10 mL) was added dropwise to a suspension of **[Ag<sub>5</sub>L<sup>II</sup><sub>5</sub>]** (0.256 g, 0.1 mmol) in anhydrous CH<sub>2</sub>Cl<sub>2</sub> (10 mL). The mixture was stirred at room temperature for 4 h. The solvent was then removed in vacuum. The residue was recrystallised from a CH<sub>2</sub>Cl<sub>2</sub>-*n*-hexane mixture (1 : 5, v/v).

**Path B.** A suspension of **HL<sup>II</sup>** (0.404 g, 1 mmol) in aqueous methanol (10 mL) was mixed with KOH (0.062 g, 1.1 mmol). The resulting mixture was added dropwise to a suspension of AgNO<sub>3</sub> (0.170 g, 1 mmol) and **phen** (0.180 g, 1 mmol) in anhydrous CH<sub>2</sub>Cl<sub>2</sub> (10 mL). The mixture was stirred at room temperature for 4 h. The resulting precipitate of KNO<sub>3</sub> was filtered off and the solvent was then removed in vacuum. The residue was recrystallised from a CH<sub>2</sub>Cl<sub>2</sub>-*n*-hexane mixture (1 : 5, v/v).

**[Ag(phen)L<sup>II</sup>]:** Yield: 0.332 g (96%, *Path A*); 0.609 g (88%, *Path B*). IR: 572 (P=S), 1003 (POC), 1516 (SCN), 1710 (C=O), 3269 (NH) cm<sup>-1</sup>. <sup>1</sup>H NMR: 1.39 (d, <sup>3</sup>J<sub>H,H</sub> = 6.1 Hz, 6 H, CH<sub>3</sub>, *i*Pr), 1.44 (t, <sup>3</sup>J<sub>H,H</sub> = 7.0 Hz, 3 H, CH<sub>3</sub>, Et), 1.48 (d, <sup>3</sup>J<sub>H,H</sub> = 6.1 Hz, 6 H, CH<sub>3</sub>, *i*Pr), 4.47 (q, <sup>3</sup>J<sub>H,H</sub> = 7.0 Hz, 2 H, CH<sub>2</sub>, Et), 4.86–5.07 (m, 2 H, OCH), 7.16–9.37 (m, C<sub>6</sub>H<sub>4</sub> + phen, overlapping with the solvent signal), 10.97 (br. s, 1 H, NH) ppm. <sup>31</sup>P{<sup>1</sup>H} NMR: 58.0 ppm. *Anal.* Calc. for C<sub>28</sub>H<sub>32</sub>AgN<sub>4</sub>O<sub>4</sub>PS<sub>2</sub> (691.55): C 48.63, H 4.66, N 8.10. Found: C 48.49, H 4.71, N 8.02.

## X-Ray crystallography

The X-ray data were collected on a STOE IPDS-II diffractometer with graphite-monochromatised Mo-K<sub>α</sub> radiation generated by a fine-focus X-ray tube operated at 50 kV and 40 mA. The reflections of the images were indexed, integrated and scaled using the X-Area data reduction package.<sup>1</sup> Data were corrected for absorption using the PLATON program.<sup>2</sup> The structures were solved by direct methods using the SHELXS-97 program<sup>3</sup> and

refined first isotropically and then anisotropically using SHELXL-97.<sup>3</sup> Hydrogen atoms were revealed from  $\Delta\rho$  maps and those bonded to C were refined using appropriate riding models. The NH hydrogen atoms in  $[\text{Cu}_3\text{L}^{\text{I}}_3]$  was freely refined whereas the same hydrogen atoms in  $[\text{Cu}_3\text{L}^{\text{II}}_3]$  and  $[\text{Ag}_4\text{L}^{\text{I}}_4]$  were geometrically positioned and refined using a riding model with N–H = 0.88 Å and  $U(\text{H}) = 1.2 U_{\text{eq}}(\text{N})$ . Figures were generated using the program Mercury.<sup>4</sup>

In  $[\text{Cu}_3\text{L}^{\text{II}}_3]$  the methyl groups of two *i*Pr and one OiPr are disordered over two positions with site occupation factors of 0.752(8), 0.50(3) and 0.51(3) for the major occupied site. The disordered atoms have been refined isotropically. In  $[\text{Ag}_4\text{L}^{\text{I}}_4]$  one OiPr and one C(O)OCH<sub>3</sub> groups are disordered over two positions with site occupation factors of 0.50(1) and 0.54(1), respectively, for the major occupied site. The disordered atoms have been refined isotropically.

**Crystal data for  $[\text{Cu}_3\text{L}^{\text{I}}_3]$ .**  $\text{C}_{45}\text{H}_{66}\text{Cu}_3\text{N}_6\text{O}_{12}\text{P}_3\text{S}_6$ ,  $M_r = 1358.93 \text{ g mol}^{-1}$ , trigonal, space group  $R\bar{3}$ ,  $a = 17.6497(2)$ ,  $b = 17.6497(2)$ ,  $c = 34.4980(5)$  Å,  $V = 9306.8(2)$  Å<sup>3</sup>,  $Z = 6$ ,  $\rho = 1.455 \text{ g cm}^{-3}$ ,  $\mu(\text{Mo-K}\alpha) = 1.356 \text{ mm}^{-1}$ , reflections: 25686 collected, 6312 unique,  $R_{\text{int}} = 0.0244$ ,  $R_1(\text{all}) = 0.0473$ ,  $wR_2(\text{all}) = 0.0960$ .

**Crystal data for  $[\text{Cu}_3\text{L}^{\text{II}}_3]$ .**  $\text{C}_{48}\text{H}_{72}\text{Cu}_3\text{N}_6\text{O}_{12}\text{P}_3\text{S}_6$ ,  $M_r = 1401.01 \text{ g mol}^{-1}$ , monoclinic, space group  $P2_1/n$ ,  $a = 11.8107(4)$ ,  $b = 19.7508(5)$ ,  $c = 27.3802(10)$  Å,  $\beta = 90.034(3)^\circ$ ,  $V = 6387.0(4)$  Å<sup>3</sup>,  $Z = 4$ ,  $\rho = 1.457 \text{ g cm}^{-3}$ ,  $\mu(\text{Mo-K}\alpha) = 1.319 \text{ mm}^{-1}$ , reflections: 43431 collected, 12987 unique,  $R_{\text{int}} = 0.0449$ ,  $R_1(\text{all}) = 0.0593$ ,  $wR_2(\text{all}) = 0.1406$ .

**Crystal data for  $[\text{Ag}_4\text{L}^{\text{I}}_4]$ .**  $\text{C}_{60}\text{H}_{88}\text{Ag}_4\text{N}_8\text{O}_{16}\text{P}_4\text{S}_8$ ,  $M_r = 1989.22 \text{ g mol}^{-1}$ , tetragonal, space group  $I4_1/a$ ,  $a = 27.4538(9)$ ,  $b = 27.4538(9)$ ,  $c = 10.7505(4)$  Å,  $V = 8102.8(5)$  Å<sup>3</sup>,  $Z = 4$ ,  $\rho = 1.631 \text{ g cm}^{-3}$ ,  $\mu(\text{Mo-K}\alpha) = 1.301 \text{ mm}^{-1}$ , reflections: 75564 collected, 4145 unique,  $R_{\text{int}} = 0.0751$ ,  $R_1(\text{all}) = 0.0791$ ,  $wR_2(\text{all}) = 0.1373$ .

CCDC 805255 ( $[\text{Cu}_3\text{L}^{\text{I}}_3]$ ), 847766 ( $[\text{Cu}_3\text{L}^{\text{II}}_3]$ ) and 813939 ( $[\text{Ag}_4\text{L}^{\text{I}}_4]$ ) contain the supplementary crystallographic data. These data can be obtained free of charge via <http://www.ccdc.cam.ac.uk/conts/retrieving.html>, or from the Cambridge Crystallographic Data Centre, 12 Union Road, Cambridge CB2 1EZ, UK; fax: (+44) 1223-336-033; or e-mail: [deposit@ccdc.cam.ac.uk](mailto:deposit@ccdc.cam.ac.uk).

## References

- 1 Stoe & Cie. X-Area. Area-Detector Control and Integration Software. Stoe & Cie, Darmstadt, Germany, 2001.
- 2 A. L. Spek, *Acta Crystallogr.*, 2009, **D65**, 148.
- 3 G. M. Sheldrick, *Acta Crystallogr.*, 2008, **A64**, 112.
- 4 I. J. Bruno, J. C. Cole, P. R. Edgington, M. Kessler, C. F. Macrae, P. McCabe, J. Pearson and R. Taylor, *Acta Crystallogr.*, 2002, **B58**, 389.

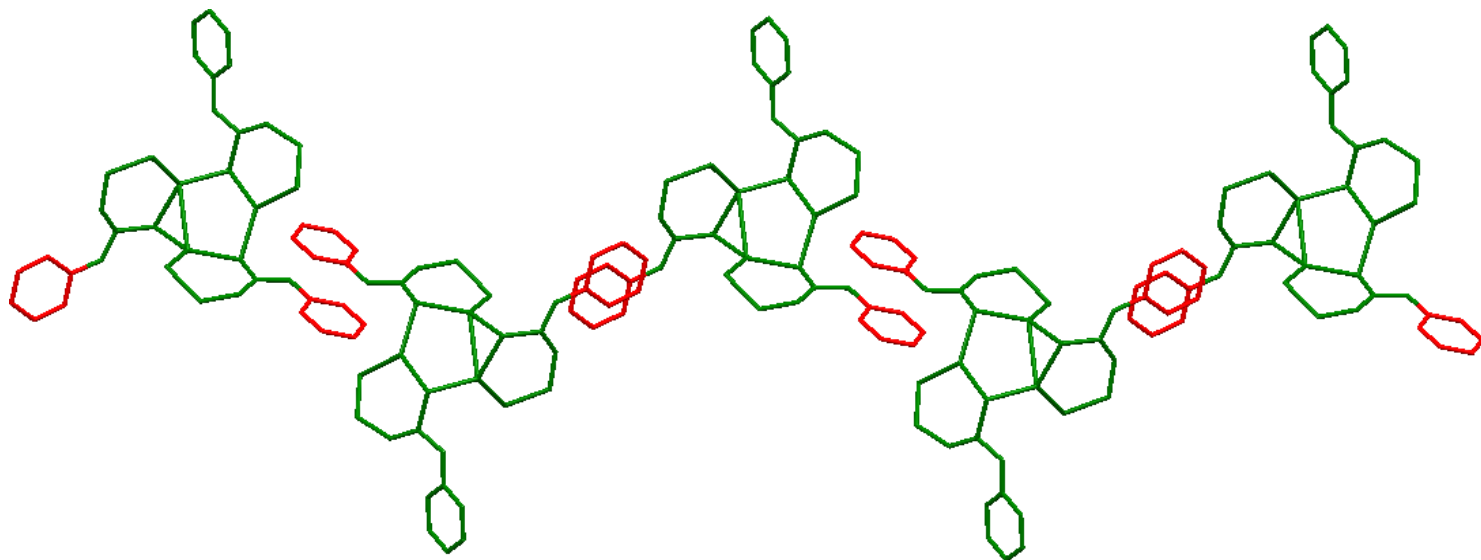

**Fig. S1**  $\pi \cdots \pi$  interactions in the structure of  $[\text{Cu}_3\text{L}^{\text{II}}]_3$ . Hydrogen atoms, *i*PrO and EtO(O)C groups are omitted for clarity.

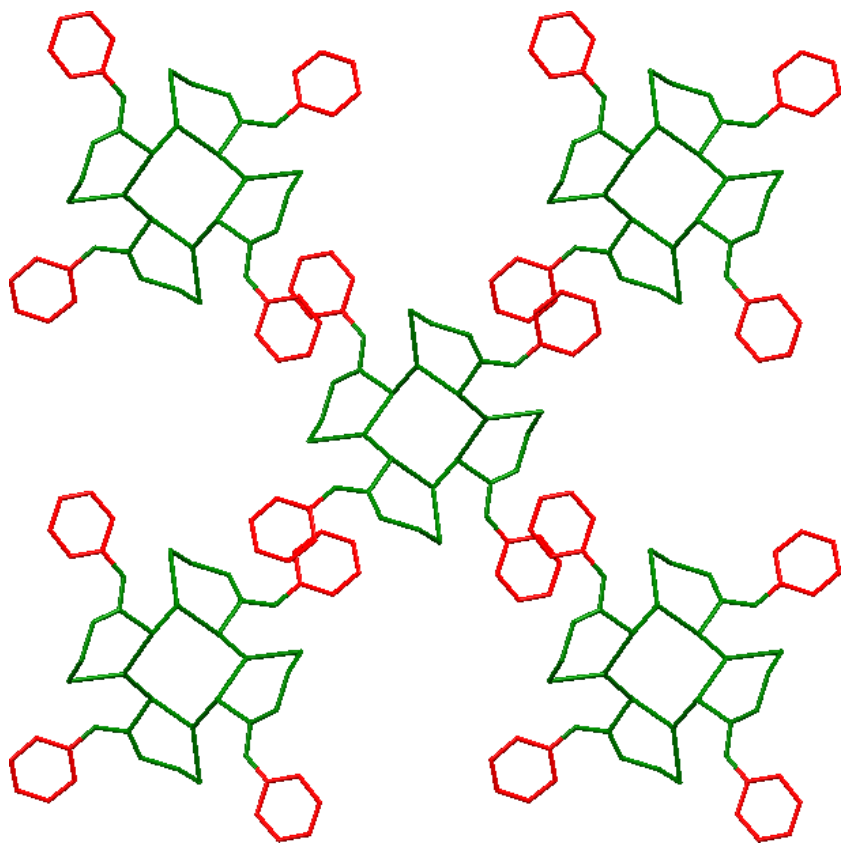

**Fig. S2**  $\pi \cdots \pi$  interactions in the structure of  $[\text{Ag}_4\text{L}^{\text{I}}]_4$ . Hydrogen atoms, *i*PrO and MeO(O)C groups are omitted for clarity.

**Table S1.** Selected bond lengths (Å) and angles (°) for [Cu<sub>3</sub>L<sup>I</sup><sub>3</sub>]

|                                           |             |                 |            |                |            |
|-------------------------------------------|-------------|-----------------|------------|----------------|------------|
| <i>Bond lengths</i>                       |             |                 |            |                |            |
| Cu(1)–S(1)                                | 2.2236(5)   | N(2)–C(1)       | 1.3582(19) | P(1)–O(2)      | 1.5699(12) |
| Cu(1)–S(2)                                | 2.2410(4)   | P(1)–N(1)       | 1.6132(14) | P(1)–S(1)      | 1.9829(6)  |
| Cu(1)–S(2)#1                              | 2.1981(4)   | P(1)–O(1)       | 1.5656(13) | S(2)–C(1)      | 1.7687(16) |
| N(1)–C(1)                                 | 1.2972(19)  |                 |            |                |            |
| <i>Bond angles</i>                        |             |                 |            |                |            |
| Cu(1)#1–S(2)–Cu(1)                        | 113.007(19) | P(1)–S(1)–Cu(1) | 90.77(2)   | O(1)–P(1)–N(1) | 106.72(7)  |
| S(1)–Cu(1)–S(2)                           | 113.407(17) | C(1)–N(1)–P(1)  | 129.08(12) | O(1)–P(1)–O(2) | 102.04(7)  |
| S(2)#1–Cu(1)–S(1)                         | 132.780(17) | N(1)–C(1)–N(2)  | 120.73(14) | O(1)–P(1)–S(1) | 114.57(5)  |
| S(2)#1–Cu(1)–S(2)                         | 113.68(2)   | N(1)–C(1)–S(2)  | 124.48(12) | O(2)–P(1)–N(1) | 105.87(7)  |
| C(1)–S(2)–Cu(1)                           | 106.77(5)   | N(1)–P(1)–S(1)  | 116.68(6)  | O(2)–P(1)–S(1) | 109.64(5)  |
| C(1)–S(2)–Cu(1)#1                         | 115.82(5)   | N(2)–C(1)–S(2)  | 114.74(11) |                |            |
| Symmetry operator: #1 $-x + y, -x + 1, z$ |             |                 |            |                |            |

**Table S2.** Selected bond lengths (Å) and angles (°) for [Cu<sub>3</sub>L<sup>II</sup><sub>3</sub>]

| <i>Bond lengths</i> |            |                    |            |                   |            |
|---------------------|------------|--------------------|------------|-------------------|------------|
| Cu(1A)–Cu(1B)       | 2.8073(6)  | N(2)–C(1)          | 1.354(4)   | P(1A)–O(2A)       | 1.665(4)   |
| Cu(1)–S(1)          | 2.2349(10) | N(1A)–C(1A)        | 1.292(5)   | P(1B)–O(2B)       | 1.567(3)   |
| Cu(1)–S(2)          | 2.2303(10) | N(2A)–C(1A)        | 1.352(5)   | P(1B)–O(1B)       | 1.587(3)   |
| Cu(1)–S(2B)         | 2.2302(9)  | N(1B)–C(1B)        | 1.287(4)   | P(1B)–O(1")       | 1.643(16)  |
| Cu(1A)–S(1A)        | 2.2433(13) | N(2B)–C(1B)        | 1.362(4)   | P(1)–S(1)         | 1.9780(12) |
| Cu(1A)–S(2A)        | 2.2096(10) | P(1)–N(1)          | 1.616(3)   | P(1A)–S(1A)       | 1.9631(17) |
| Cu(1B)–S(1B)        | 2.2492(12) | P(1A)–N(1A)        | 1.585(3)   | P(1B)–S(1B)       | 1.9735(14) |
| Cu(1B)–S(2B)        | 2.2032(9)  | P(1B)–N(1B)        | 1.608(3)   | S(2)–C(1)         | 1.771(3)   |
| S(2)–Cu(1A)         | 2.2278(11) | P(1)–O(1)          | 1.567(2)   | S(2A)–C(1A)       | 1.785(4)   |
| S(2A)–Cu(1B)        | 2.2510(10) | P(1)–O(2)          | 1.570(2)   | S(2B)–C(1B)       | 1.778(3)   |
| N(1)–C(1)           | 1.299(4)   | P(1A)–O(1A)        | 1.552(3)   |                   |            |
| <i>Bond angles</i>  |            |                    |            |                   |            |
| Cu(1A)–S(2)–Cu(1)   | 94.74(4)   | C(1A)–S(2A)–Cu(1A) | 106.56(12) | N(1A)–P(1A)–S(1A) | 121.54(13) |
| Cu(1A)–S(2A)–Cu(1B) | 78.00(3)   | C(1A)–S(2A)–Cu(1B) | 98.76(12)  | N(1B)–P(1B)–S(1B) | 120.88(13) |
| Cu(1B)–S(2B)–Cu(1)  | 95.56(3)   | C(1B)–S(2B)–Cu(1)  | 107.72(11) | O(1)–P(1)–N(1)    | 110.89(15) |
| S(1A)–Cu(1A)–Cu(1B) | 111.51(4)  | C(1B)–S(2B)–Cu(1B) | 107.78(11) | O(2)–P(1)–N(1)    | 103.67(14) |
| S(1B)–Cu(1B)–Cu(1A) | 117.24(3)  | P(1)–S(1)–Cu(1)    | 95.20(4)   | O(1A)–P(1A)–N(1A) | 105.59(19) |
| S(2)–Cu(1A)–Cu(1B)  | 102.28(3)  | P(1A)–S(1A)–Cu(1A) | 97.05(6)   | O(2A)–P(1A)–N(1A) | 97.51(18)  |
| S(2A)–Cu(1B)–Cu(1A) | 50.34(3)   | P(1B)–S(1B)–Cu(1B) | 96.23(5)   | O(1B)–P(1B)–N(1B) | 104.20(17) |
| S(2A)–Cu(1A)–Cu(1B) | 51.66(3)   | C(1)–N(1)–P(1)     | 129.1(2)   | O(2B)–P(1B)–N(1B) | 104.27(16) |
| S(2B)–Cu(1B)–Cu(1A) | 104.77(3)  | C(1A)–N(1A)–P(1A)  | 135.0(3)   | O(1")–P(1B)–N(1B) | 110.1(6)   |
| S(1B)–Cu(1B)–S(2A)  | 120.58(4)  | C(1B)–N(1B)–P(1B)  | 134.3(3)   | O(1)–P(1)–O(2)    | 102.52(14) |
| S(2)–Cu(1)–S(1)     | 114.40(4)  | N(1)–C(1)–N(2)     | 120.8(3)   | O(1A)–P(1A)–O(2A) | 98.98(19)  |
| S(2)–Cu(1A)–S(1A)   | 125.65(4)  | N(1A)–C(1A)–N(2A)  | 121.4(3)   | O(2B)–P(1B)–O(1B) | 98.14(18)  |
| S(2A)–Cu(1A)–S(1A)  | 116.53(4)  | N(1B)–C(1B)–N(2B)  | 120.5(3)   | O(2B)–P(1B)–O(1") | 119.8(6)   |
| S(2A)–Cu(1A)–S(2)   | 117.82(4)  | N(1)–C(1)–S(2)     | 126.8(3)   | O(1)–P(1)–S(1)    | 108.86(10) |
| S(2B)–Cu(1)–S(1)    | 126.22(4)  | N(1A)–C(1A)–S(2A)  | 128.4(3)   | O(2)–P(1)–S(1)    | 110.70(11) |
| S(2B)–Cu(1)–S(2)    | 119.38(4)  | N(1B)–C(1B)–S(2B)  | 127.6(3)   | O(1A)–P(1A)–S(1A) | 118.48(16) |
| S(2B)–Cu(1B)–S(1B)  | 115.28(4)  | N(2)–C(1)–S(2)     | 112.3(2)   | O(2A)–P(1A)–S(1A) | 110.49(14) |
| S(2B)–Cu(1B)–S(2A)  | 124.11(4)  | N(2A)–C(1A)–S(2A)  | 110.2(3)   | O(1B)–P(1B)–S(1B) | 112.76(15) |
| C(1)–S(2)–Cu(1)     | 105.69(11) | N(2B)–C(1B)–S(2B)  | 111.7(2)   | O(2B)–P(1B)–S(1B) | 113.77(12) |
| C(1)–S(2)–Cu(1A)    | 105.82(12) | N(1)–P(1)–S(1)     | 118.90(11) | O(1")–P(1B)–S(1B) | 88.5(6)    |

**Table S3.** Selected bond lengths (Å) and angles (°) for [Ag<sub>4</sub>L<sup>I</sup><sub>4</sub>]

| <i>Bond lengths</i>                                                                |            |                 |          |                 |           |
|------------------------------------------------------------------------------------|------------|-----------------|----------|-----------------|-----------|
| Ag(1)–S(1)                                                                         | 2.477(2)   | C(1)–N(2)       | 1.358(6) | P(1)–O(2)       | 1.680(11) |
| Ag(1)–S(2)                                                                         | 2.5134(15) | C(1)–S(2)       | 1.767(5) | P(1)–O(2')      | 1.548(8)  |
| Ag(1)–S(2)#1                                                                       | 2.4182(16) | P(1)–N(1)       | 1.616(5) | P(1)–S(1)       | 1.951(3)  |
| C(1)–N(1)                                                                          | 1.283(7)   | P(1)–O(1)       | 1.560(5) |                 |           |
| <i>Bond angles</i>                                                                 |            |                 |          |                 |           |
| Ag(1)#2–S(2)–Ag(1)                                                                 | 92.15(5)   | C(1)–N(1)–P(1)  | 128.9(4) | N(1)–P(1)–S(1)  | 117.0(2)  |
| S(1)–Ag(1)–S(2)                                                                    | 104.21(6)  | N(1)–C(1)–N(2)  | 120.5(5) | O(1)–P(1)–O(2)  | 94.9(4)   |
| S(2)#1–Ag(1)–S(1)                                                                  | 134.84(6)  | N(1)–C(1)–S(2)  | 125.5(4) | O(1)–P(1)–O(2') | 112.4(4)  |
| S(2)#1–Ag(1)–S(2)                                                                  | 120.93(6)  | N(2)–C(1)–S(2)  | 114.0(4) | O(1)–P(1)–S(1)  | 115.4(2)  |
| C(1)–S(2)–Ag(1)                                                                    | 102.27(18) | N(1)–P(1)–O(1)  | 107.1(3) | O(2)–P(1)–S(1)  | 120.9(4)  |
| C(1)–S(2)–Ag(1)#2                                                                  | 111.14(19) | N(1)–P(1)–O(2)  | 98.2(4)  | O(2')–P(1)–S(1) | 94.9(4)   |
| P(1)–S(1)–Ag(1)                                                                    | 94.49(8)   | N(1)–P(1)–O(2') | 109.7(3) |                 |           |
| Symmetry operators: #1 –y + 5/4, x + 1/4, –z + 1/4; #2 y – 1/4, –x + 5/4, –z + 1/4 |            |                 |          |                 |           |

**Table S4.** Hydrogen bond lengths (Å) and angles (°) for [Cu<sub>3</sub>L<sup>II</sup><sub>3</sub>] and [Ag<sub>4</sub>L<sup>I</sup><sub>4</sub>]

| Complex                                         | D–H···A              | d(D–H)  | d(H···A) | d(D···A)   | ∠(DHA)    |
|-------------------------------------------------|----------------------|---------|----------|------------|-----------|
| [Cu <sub>3</sub> L <sup>I</sup> <sub>3</sub> ]  | N(2)–H(2)···O(3)     | 0.81(2) | 2.05(2)  | 2.6794(19) | 133.8(19) |
| [Cu <sub>3</sub> L <sup>II</sup> <sub>3</sub> ] | N(2)–H(2)···O(3)     | 0.88    | 2.07     | 2.664(4)   | 124       |
|                                                 | N(2A)–H(2A1)···O(3A) | 0.88    | 1.91     | 2.649(4)   | 141       |
|                                                 | N(2B)–H(2B)···O(3B)  | 0.88    | 1.98     | 2.647(4)   | 132       |
| [Ag <sub>4</sub> L <sup>I</sup> <sub>4</sub> ]  | N(2)–H(2)···O(3)     | 0.88    | 2.00     | 2.692(9)   | 135       |
|                                                 | N(2)–H(2)···O(3')    | 0.88    | 1.92     | 2.653(9)   | 140       |

**Table S5.** Selected  $\pi \cdots \pi$  interactions for [Cu<sub>3</sub>L<sup>II</sup><sub>3</sub>] and [Ag<sub>4</sub>L<sup>I</sup><sub>4</sub>]

|                                                              | Cg(I) <sup>a</sup> | Cg(J) <sup>a</sup> | Cg–Cg <sup>b</sup> (Å) | Dihedral angle (°) | Beta <sup>c</sup> (°) |
|--------------------------------------------------------------|--------------------|--------------------|------------------------|--------------------|-----------------------|
| [Cu <sub>3</sub> L <sup>II</sup> <sub>3</sub> ] <sup>d</sup> | Cg(8)              | Cg(8)#1            | 4.263(2)               | 0.03               | 38.23                 |
|                                                              | Cg(9)              | Cg(9)#2            | 3.896(2)               | 0.03               | 25.65                 |
| [Ag <sub>4</sub> L <sup>I</sup> <sub>4</sub> ] <sup>e</sup>  | Cg(2)              | Cg(2)#1            | 3.941(5)               | 0.00               | 26.43                 |

<sup>a</sup> Cg refers to the ring center of gravity and the numbers represent the rings involved in the interactions.

<sup>b</sup> Cg–Cg: distance between ring centroids.

<sup>c</sup> Beta: angle Cg(I) → Cg(J) vector and normal to plane I.

<sup>d</sup> Cg(8): C(11A)–C(12A)–C(13A)–C(14A)–C(15A)–C(16A). Cg(9): C(11B)–C(12B)–C(13B)–C(14B)–C(15B)–C(16B). Symmetry code: #1 –x, 1 –y, 1 –z; #2 1 –x, 2 –y, 1 –z.

<sup>e</sup> Cg(2): C(11)–C(12)–C(13)–C(14)–C(15)–C(16). Symmetry code: #1  $3/2 - x, 3/2 - y, 1/2 - z$ .
